**ORIGINAL ARTICLE**

# What are the demographic consequences of a seed bank stage for columnar cacti?

Gabriel Arroyo-Cosultchi<sup>1,2</sup> | María C. Mandujano<sup>3</sup> | Roberto Salguero-Gómez<sup>4,5,6</sup> | Armando J. Martínez<sup>7</sup> | Jordan Golubov<sup>1</sup>

<sup>1</sup>Departamento El Hombre y su Ambiente, Universidad Autónoma Metropolitana Xochimilco. Calzada del Hueso 1100. Col Villa Quietud, 04960, México. DF., México

<sup>2</sup>Departamento de Ecología y Recursos Naturales, Facultad de Ciencias. Universidad Nacional Autónoma de México, México. DF., México

<sup>3</sup>Instituto de Ecología, Departamento de Ecología de la Biodiversidad, Laboratorio de Genética y Ecología, Universidad Nacional Autónoma de México, México. DF., México

<sup>4</sup>Department of Zoology, University of Oxford, Oxford OX13SZ, UK.

<sup>5</sup>School of Biological Sciences, Centre for Biodiversity and Conservation Science, The University of Queensland, St Lucia, QLD 4072, Australia.

<sup>6</sup>Laboratory of Evolutionary Demography, Max Planck Institute for Demographic Research, Rostock, DE-18057, Germany.

<sup>7</sup>Instituto de Neuroetología, Universidad Veracruzana, Xalapa, Veracruz, México.

## Correspondence

\*Jordan Golubov, Departamento El Hombre y su Ambiente, Universidad Autónoma Metropolitana Xochimilco. Calzada del Hueso 1100. Col Villa Quietud, 04960, México. DF., México Email: [gfordan@correo.xoc.uam.mx](mailto:gfordan@correo.xoc.uam.mx), [jgolubov@gmail.com](mailto:jgolubov@gmail.com)

## Abstract

The dynamics of plants populations are often limited by the early stages in their life cycles. The question if the columnar cacti have or not a seed bank in predictable environments. Yet, information regarding seed bank dynamics and how these may influence the full life cycle of plant species is remarkably scarce or ignore. This lack of knowledge is mostly due to the challenges in quantifying seed vital rates. Studies of arid land plant species have historically been focused on the drivers of sporadic recruitment. However, little attention has been given to the demographic consequences of early developmental stages, including seed banks. Here, we evaluate the effects of seed bank survival and seedling recruitment vital rates on the population dynamics and viability of 12 columnar cacti species, recent evidence suggests that cacti seeds may remain viable for the short-term. We assess how changes in the vital rates of these processes, and the inclusion of a seed bank affect population growth rate ( $\lambda$ ). We found that a seed bank in the examined matrix population models significantly increased  $\lambda$  as well as the vital rate elasticities of  $\lambda$  to growth and fecundity, whereas that of overall survival decreased. Our numerical simulations showed that seed survival had a larger effect on  $\lambda$  than seedling recruitment and establishment. We suggest that seed bank may explain the structure and population dynamics. Thus, we argue reconsider that this early stage in demographic models will generate more informed decisions on the conservation and management of columnar cacti.

## KEYWORDS:

Cactaceae, comparative demography, matrix population models, population dynamics, seed and seedling limitation, seed bank

## 1 | INTRODUCTION

In plant populations, seeds and seedlings often act as primary constraints to population size and demographic viability (Ågren, 1996; Crawley, 1990), particularly true for short to mid-lived species (Silvertown et al., 1993; Franco and Silvertown, 2004). On the one hand, seed limitation whereby the

number of individuals increases following seed addition (Turnbull et al., 2000), occurs when insufficient amounts of seeds are produced (Ågren, 1996), when these are not viable (Bell et al., 1993) or when their dispersal is limited (Clark et al., 2007). On the other hand, the establishment of those seeds as seedlings may be limited by factors such as environmental stress, cross-pollination, pollinator limitation (Bell et al., 1993)

7  
8  
9  
10  
11  
12  
13

14 or microsite availability (Eriksson and Ehrlén, 1992; Turn- 64  
15 bull et al., 2000), regardless of seed limitation (Clark et al., 65  
16 2007). Seedling recruitment is understood as the process by 66  
17 which new individuals are added to a population, including 67  
18 seed germination, seedling survivorship, and seedling growth 68  
19 (Eriksson and Ehrlén, 2008).

20 Seedling recruitment in cactus species is largely recognized 70  
21 as a critical process in their life cycles, and thus as an important 71  
22 restriction to population growth rate  $\lambda$  (Mandujano et al., 1996; 72  
23 Godínez-Álvarez et al., 2003; Martínez et al., 2010; Arroyo- 73  
24 Cosultchi et al., 2016). While several studies have examined 74  
25 the mechanisms limiting recruitment in the Cactaceae, these 75  
26 have predominantly assessed establishment limitation (Steen- 76  
27 bergh and Lowe, 1977; Cody, 1993; Godínez-Álvarez et al., 77  
28 2003; Mandujano et al., 2007; Holland and Molina-Freaner, 78  
29 2013). However, the demographic consequences of seed and 79  
30 seedling limitation in this diverse taxon have been largely over- 80  
31 looked. Studies in Cactaceae show a high potential germina- 81  
32 tion rate in laboratory conditions, which contrasts with the high 82  
33 seedling mortality rates reported in the field (Esparza-Olguín 83  
34 et al. 2002; Pierson et al. 2013; Holland and Molina-Freaner 84  
35 2013; Zepeda-Martínez et al. 2013). Together, this group of 85  
36 research suggests that demographic processes at the interface 86  
37 of seed limitation and seedling recruitment are crucial to life 87  
38 cycles and to population dynamics in Cactaceae.

39 An important trait for plant species inhabiting unpredictable 89  
40 environments such as arid lands, is the ability to generate seed 90  
41 banks (Guterman, 1994). This strategy is thought to be a 91  
42 fundamental component for population persistence in variable 92  
43 environments (Pake and Venable, 1996) and it is, therefore, a 93  
44 key factor that affects seed and seedling limitation (Venable, 94  
45 2007). However, estimating seed bank dynamics is challenging 95  
46 as seed longevity depends on morphological and physiological 96  
47 traits such as seed size, dormancy, and photoblastism (Baskin 97  
48 and Baskin, 1989; Rojas-Aréchiga and Batis, 2001; Rojas- 98  
49 Aréchiga, 2014), as well as on mortality by biotic drivers such 99  
50 granivores and pathogens (Álvarez-Espino et al., 2014). So 100  
51 obtaining accurate estimates for survival and germination of 101  
52 seeds (often times of a more few millimeters) in the soil can be 102  
53 an arduous task (Adams et al., 2005; Nguyen et al., 2019).

54 Even though the presence/absence of a seed bank can be 104  
55 important in demographic terms (Kalisz and McPeck, 1992; 105  
56 Doak et al., 2002), these are not always included in plant demo- 106  
57 graphic models (Nguyen et al., 2019). This is so albeit evidence 107  
58 of their presence in numerous species (Doak et al., 2002; 108  
59 Nguyen et al., 2019). Still, this life stage is commonly assumed 109  
60 to be non-existent or short-lived or the origin of seedlings is 110  
61 not differentiated. Seeds residence time in the soil determines 111  
62 if the species may generate a transient ( $<1$  year), short-term ( $\geq$  112  
63 1 but  $<5$  years) or long-term persistent seed bank ( $\geq 5$  years)

*sensu* (Bakker et al., 1996; Thompson et al., 1997). The pres- 64  
ence of seed banks is often correlated with a short mean life 65  
expectancy of established individuals (Cohen, 1966); however, 66  
seeds dormancy and the formation of a seed bank are poten- 67  
tially costly features (Rees, 1994). Additionally, seed banking 68  
in long-lived organisms can serve as a hedge against recruit- 69  
ment failure from periodical fluctuations in seed production 70  
and/or seedling recruitment (Rees, 1994).

71 The inclusion - or not - of seed banks in population models 72  
can affect the assessment of the population dynamics (Doak 73  
et al., 2002; Nguyen et al., 2019). In existing population mod- 74  
els in the Cactaceae, seed banks are rarely explicitly considered 75  
(Schmalzel et al., 1995; Godínez-Álvarez et al., 2003; Zepeda- 76  
Martínez et al., 2013; Mandujano et al., 2015). Indeed across 77  
columnar cacti, most demographic studies do not include seed 78  
banks (Godínez-Álvarez et al., 1999; Esparza-Olguín et al., 79  
2005; Rojas-Sandoval and Meléndez-Ackerman, 2013), except 80  
in *Cephalocereus polylophus* (Arroyo-Cosultchi et al., 2016). 81  
Assuming no seed banks in the Cactaceae may be correct if 82  
seed viability quickly decreases after dispersal (seed limita- 83  
tion; Rojas-Aréchiga and Batis, 2001; Méndez et al., 2004), 84  
or if granivore pressure is high (dispersal limitation; Valiente- 85  
Banuet and Ezcurra, 1991; Sosa and Fleming, 2002; Clark- 86  
Tapia et al., 2005). However, growing evidence suggests that 87  
cactus seeds may remain viable for significant periods of time 88  
(e.g. 1-2 years) (Mandujano et al., 1997), leading to a potential 89  
short-term seed bank (Godínez-Álvarez et al., 2003; Bowers, 90  
2005; Cano-Salgado et al., 2012; Álvarez-Espino et al., 2014; 91  
Ordoñez Salanueva et al., 2017; Lindow-López et al., 2018).

92 Matrix population models are useful tools in plant popula- 93  
tion ecology, as they provide a common conceptual framework 94  
for comparative research (Silvertown et al., 1993; Salguero- 95  
Gómez and de Kroon, 2010; Salguero-Gómez and Plotkin, 96  
2010; Nguyen et al., 2019). The growing number of studies 97  
using comparative approaches with matrix population mod- 98  
els (Salguero-Gómez et al., 2015) has allowed linking specific 99  
vital rates (Franco and Silvertown, 2004; Adier et al., 2014) 100  
and stages in ecological successional gradients (Silvertown 101  
et al., 2002), life history evolution (Burns et al., 2010), pop- 102  
ulation dynamics of native vs. invasive plant species (Ramula 103  
et al., 2008), or senescence (Baudisch et al., 2013; Jones et al., 104  
2014) among others. We focused on the vital rates of seed 105  
bank survival and seedling recruitment to examine their rela- 106  
tive effects on the overall population growth rates ( $\lambda$ ). We apply 107  
matrix population models to assess (i) the role of seed banks 108  
and related dynamics (e.g. recruitment of seedling from seed 109  
bank) as opposed to recruitment from direct reproduction, *i.e.* 110  
without seed banks, on the vital rate elasticities and popula- 111  
tion growth rate ( $\lambda$ ) and, (ii) evaluate the potential effects on  $\lambda$  112  
of an increase in the vital rate of seed banks, the seed-seedling 113  
transition and seedling survival on  $\lambda$ . 114

## 115 2 | MATERIALS AND METHODS

### 116 2.1 | The Database

117 We used a comparative approach to determine the effects of  
118 a seed bank stage on the population dynamics of columnar  
119 cacti using published matrix population models. We searched  
120 the ISI Web of Science and Scopus electronic databases using  
121 the keywords "columnar cacti", "demography", "population  
122 model", and "population growth rate" since September 1993.  
123 We included studies that explicitly used a matrix population  
124 model for columnar cacti belonging to the taxonomic tribe  
125 Pachycereae and Trichocereae (Anderson, 2001). Additional  
126 studies were obtained by studying the latest issues of ecologi-  
127 cal journals and by including data from ([http://www.dgbiblio.  
128 unam.mx/index.php/catalogos](http://www.dgbiblio.unam.mx/index.php/catalogos) Accessed 30 July 2015), the  
129 COMPADRE Plant Matrix Database (Salguero-Gómez et al.,  
130 2015, see Table 1 ), as well as part of collective, ongoing  
131 unpublished research. Our criteria for study selection included  
132 at least one matrix population model (Caswell, 2001) to esti-  
133 mate the population growth rate ( $\lambda$ ). If the study had more  
134 matrices (*i.e.* >1 annual transition or populations), matrices  
135 were averaged across years or sites to obtain a single, represen-  
136 tative matrix model per species (see Supplementary Appendix  
137 A for all original mean matrices). The final sample size con-  
138 tained 12 matrices, one matrix for each columnar cacti species  
139 (Table 1 ).

### 140 2.2 | Reduction of matrix dimensions

141 A critical step in comparative stage-structured demographic  
142 studies is the selection of the dimension (stage or size classes)  
143 as dimensionality affects  $\lambda$  and derived metrics (Enright  
144 et al., 1995; Ramula and Lehtilä, 2005; Salguero-Gómez and  
145 Plotkin, 2010; Picard and Liang, 2014). To overcome poten-  
146 tial biases in our comparative inference on the role of seed  
147 bank survival and seedling recruitment for population dynam-  
148 ics, we standardized the variable matrix dimensions in our  
149 study, ranging originally from  $15 \times 15$  for *Carnegiea gigan-*  
150 *tea* to  $6 \times 6$  for *Harrisia fragrans* (Table 1 ). To test whether  
151 changes in matrix dimension significant changed vital rates we  
152 chose matrix dimensions of  $6 \times 6$ ,  $5 \times 5$ , and  $4 \times 4$  with-  
153 out a seed bank stage (hereafter WOSB) and the inclusion  
154 of a seed bank resulted in  $7 \times 7$ ,  $6 \times 6$ , and  $5 \times 5$  matrix  
155 dimensions respectively (hereafter WSB, see Supplementary  
156 Appendix A for all original and reduced matrices). We used the  
157 algorithm developed by Salguero-Gómez and Plotkin (2010)  
158 for size/stage-based matrices, adapted from Hooley (2000) for  
159 age-based models. This algorithm allows the reduction of a  
160 given matrix population model of  $n \times n$  dimensions into  $m \times m$ ,  
161 where  $m < n$ . There are naturally different ways of reducing

a matrix population model of interest of  $n > 2$ ; here, we fol-  
lowed the recommendation by Salguero-Gómez and Plotkin  
(2010), whereby early life cycle stages (e.g. Figure 1 ) were  
left unaltered as they were also the life stages of interest for  
this study. This method preserves population growth rates,  
stable class distributions, and reproductive output, through  
the assumption of stationary stability (Salguero-Gómez and  
Plotkin, 2010).

Matrix population models in our study were reduced by  $n -$   
1 dimensions by merging the two adjacent size categories with  
the lowest number of individuals as reported by the population  
vector  $n(t)$  while leaving the remaining stages unaltered. Here,  
we did not reduce reproductive and non-reproductive stages  
into the same class and the stage corresponding to seedlings  
was kept unaltered (Table 1 ).

The number of stages for each matrix was reduced by com-  
bining information for adjacent stages to generate new esti-  
mates of survival in a given stage class  $j$  ( $\sigma_j$ ), negative growth  
( $\rho_{ij}$ ), positive growth ( $\gamma_{ij}$ ), individual fecundity ( $\phi_{ij}$ ), and indi-  
vidual ramet production ( $\kappa_{ij}$ ) (Franco and Silvertown, 2004).  
Fecundity entries were estimated from the information found  
in the original source (see Section 2.1) as the *per capita* num-  
ber of seeds in each reproductive size category (Table 2 ). The  
seed to seedling transition was reported as the number of seeds  
 $\times$  seed germination. When seed germination was calculated  
from laboratory and experiments under natural conditions in  
different sources we averaged both germination percentages  
as germination in natural conditions usually includes factors  
that affect or limit germination (granivory, drought, and fun-  
gal attack). Seedling survival was calculated by the survival  
of seedlings in field or laboratory conditions reported in each  
study (Table 2 ).

### 162 2.3 | The importance of the seed bank

In the species that fulfilled our criteria, we included a hypo-  
thetical short-term seed bank ( $\geq 1$  year) with an initial survival  
value of 0.05, except in *C. polylophus* where the transient seed  
bank is known (Arroyo-Cosultchi et al., 2016). In the WSB  
model individuals in an unstructured seed bank assumed no  
senescence and are thus potentially immortal. Since a seed  
bank is a discrete stage class and did not involve categorization,  
transition rates for the other classes should remain unaffected  
by its inclusion (Nguyen et al., 2019), however as a conse-  
quence, a temporal component in terms of longer life cycles  
was added. After that, the finite rate of population increase ( $\lambda$ ),  
the stable structure of each stage ( $w$ ), and the specific repro-  
ductive value per stage ( $v$ ) were calculated using the WOSB ( $6$   
 $\times 6$ ) (Figure 1 a) or WSB ( $7 \times 7$ ) (Figure 1 b) models for each  
species (Caswell, 2001). To test for the significance of a seed  
bank on the population dynamics of our examined species, we

**TABLE 1** Species used in this study for which matrix population models are available, showing the original dimension of the matrices (in gray), and the adjacent life cycle classes that were reduced (in black) to produce matrices with the same dimension:  $6 \times 6$ . Stage 1 was always kept unaltered because it contains the seedling stage. \*Note that all matrices lack seed bank (stage 0), except for *Cephalocereus polylophus* (stage 0, Figure 1 b). <sup>1</sup>Silvertown et al. (1993), <sup>2</sup>Esparza-Olguín et al. (2002), <sup>2,3,5</sup>Esparza-Olguín et al. (2005), <sup>2,5</sup>Godínez-Alvarez and Valiente-Banuet (2004), <sup>4</sup>(Arroyo-Cosultchi et al., 2016), <sup>5</sup>Godínez-Alvarez et al. (1999), <sup>6</sup>Ortega (2001), <sup>7</sup>Rae and Ebert (2002), <sup>8</sup>Rojas-Sandoval and Meléndez-Ackerman (2013), <sup>9</sup>Méndez et al. (2004), <sup>10</sup>Morales-Romero et al. (2012), <sup>11</sup>Silva (1996), and <sup>12</sup>Clark-Tapia et al. (2005).

| Species/original stages                         | 0 | 1 | 2 | 3 | 4 | 5 | 6 | 7 | 8 | 9 | 10 | 11 | 12 | 13 | 14 | 15 |
|-------------------------------------------------|---|---|---|---|---|---|---|---|---|---|----|----|----|----|----|----|
| <i>Carnegiea gigantea</i> <sup>1</sup>          |   |   |   |   |   |   |   |   |   |   |    |    |    |    |    |    |
| <i>Cephalocereus macrocephalus</i> <sup>2</sup> |   |   |   |   |   |   |   |   |   |   |    |    |    |    |    |    |
| <i>C. mezcalaensis</i> <sup>3</sup>             |   |   |   |   |   |   |   |   |   |   |    |    |    |    |    |    |
| <i>C. polylophus</i> <sup>4,*</sup>             |   |   |   |   |   |   |   |   |   |   |    |    |    |    |    |    |
| <i>C. tetetzo</i> <sup>5</sup>                  |   |   |   |   |   |   |   |   |   |   |    |    |    |    |    |    |
| <i>Escontria chiotilla</i> <sup>6</sup>         |   |   |   |   |   |   |   |   |   |   |    |    |    |    |    |    |
| <i>Harrisia fragrans</i> <sup>7</sup>           |   |   |   |   |   |   |   |   |   |   |    |    |    |    |    |    |
| <i>H. portoricensis</i> <sup>8</sup>            |   |   |   |   |   |   |   |   |   |   |    |    |    |    |    |    |
| <i>Pachycereus gaumeri</i> <sup>9</sup>         |   |   |   |   |   |   |   |   |   |   |    |    |    |    |    |    |
| <i>P. pecten-aboriginum</i> <sup>10</sup>       |   |   |   |   |   |   |   |   |   |   |    |    |    |    |    |    |
| <i>P. pringlei</i> <sup>11</sup>                |   |   |   |   |   |   |   |   |   |   |    |    |    |    |    |    |
| <i>Stenocereus eruca</i> <sup>12</sup>          |   |   |   |   |   |   |   |   |   |   |    |    |    |    |    |    |

211 used a paired *t*-test ( $\alpha = 0.05$ ) using the values of  $\lambda$  obtained  
 212 from the WOSB and WSB models. The elasticity ( $e_{ij}$ ) and sensi-  
 213 tivity ( $s_{ij}$ ) matrices were calculated using the  $v$  and  $w$  vectors  
 214 (Caswell, 2001) and finally, 95 % confidence intervals for  $\lambda$   
 215 were estimated in order to use the analytic method suggested  
 216 by Alvarez-Buylla and Slatkin (1991).

217 We explored the role of species, matrix dimension and seed  
 218 bank on vital rates elasticities for WOSB and WSB models.  
 219 Elasticities were calculated from each of the following vital  
 220 rates: survival in a given stage class ( $\sigma$ ), negative growth ( $\rho$ ),  
 221 positive growth ( $\gamma$ ), and individual fecundity ( $\phi$ ) (Silvertown  
 222 et al., 1993; Franco and Silvertown, 2004) for WOSB ( $6 \times 6$ ,  
 223  $5 \times 5$ , and  $4 \times 4$ ) and WSB models ( $7 \times 7$ ,  $6 \times 6$ , and  $5 \times$   
 224  $5$ ). We used PCA to summarize the correlation among elastic-  
 225 ities of vital rates and included species and presences/absence  
 226 of a seed bank as variables, keeping matrix dimension as a  
 227 factor. PCA scores were extracted from the first four princi-  
 228 pal components (PC1 to PC4) for all variables and identified  
 229 the most important variable among factor loadings. Finally, we  
 230 conducted a one-way ANOVA ( $\alpha = 0.05$ ) on the first four prin-  
 231 cipal component scores (PC1-PC4), and *post hoc* Tukey tests  
 232 ( $\alpha = 0.05$ ) using matrix dimension as the explanatory variable.  
 233 PCA's were performed with the `prcomp` function of the "stats"  
 234 R library (R Development Core Team, 2017).

## 2.4 | Numerical simulations

235 The relative importance of seed bank survival and seedling  
 236 recruitment from the seed bank was evaluated through numeri-  
 237 cal simulations (Adams et al., 2005; Nguyen et al., 2019).  
 238 As seedling recruitment was reported in studies, the average  
 239 probability of germination and fecundity were used as a proxy  
 240 for the transition from seed to seedling. No clonal reproduc-  
 241 tion into the seedling stage happened such that the observed  
 242 seedlings only consisted of two components: the individuals  
 243 that germinated immediately between year  $t$  and  $t + 1$  and those  
 244 that germinated from the dormant seed bank from prior years  
 245 (Figure 1 b). The probability of germinating within the census  
 246 year is equal to the probability of germinating from the seed  
 247 bank (Kalisz and McPeck, 1992).  
 248

249 We conducted simulation experiments to explore the influ-  
 250 ence on  $\lambda$  when vital rate probabilities during the first life  
 251 stages were modified. With these simulations, we assessed  
 252 the possible effects of a seed bank on columnar cacti popula-  
 253 tions during rare but potentially important events with excep-  
 254 tionally high or low seedling recruitment and establishment.  
 255 Despite their rarity, these types of events can have substantial  
 256 impacts on long-term population dynamics (Morris and Doak,  
 257 2002). The frequency and effects of these events are highly  
 258 uncertain for columnar cacti, so we covered a wider range  
 259 of seed survival potential, seedling recruitment and establish-  
 260 ment probabilities and, impacts on the simulations to highlight  
 261 recruitment events that are likely to be important for population  
 262 growth rates. All simulations were performed independently

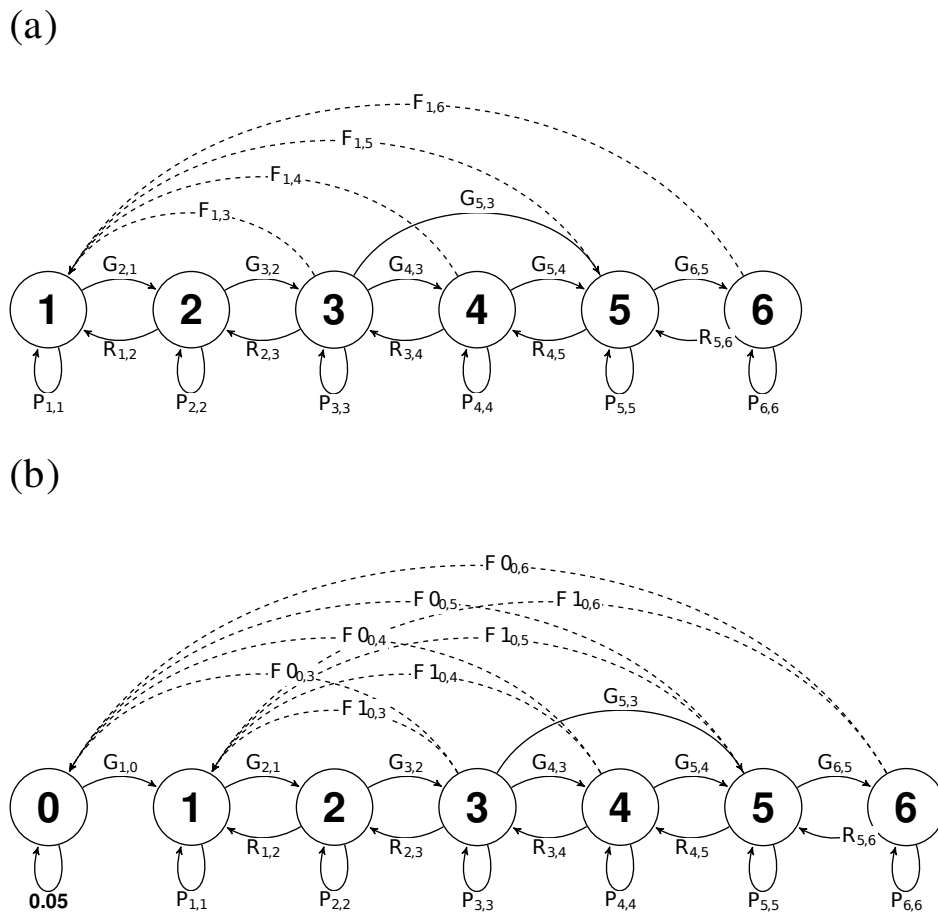

**FIGURE 1** Life cycle diagrams of the matrix population models used: (a) WOSB, and (b) WSB models. Six and seven classes of individuals are possible: seeds (0), seedling (1), juvenile (2), and reproductive adults (3-6). The arrows represent the following demographic elements: stasis (P), retrogression (R), growth (G), and fecundity (F; dashed lines). The transition rate (F0) gives the fecundity into the seed bank and (F1) gives the fecundity into the seedling stage.

263 for the WOSB ( $6 \times 6$ ), and WSB ( $7 \times 7$ ) models. We, therefore, 278  
 264 modified the following entries depending on the presence/ab- 279  
 265 sence of a seed bank: seed bank ( $\sigma_{sb}$ ), seedling survival ( $\sigma_{se}$ ), 280  
 266 recruitment of seedlings from the seed bank ( $\gamma_{sb-se}$ ), the tran- 281  
 267 sition from seedling to juvenile ( $\gamma_{se-ju}$ ), and juvenile survival 282  
 268 ( $\sigma_{ju}$ ). These entries of the vital rates were modified during each 283  
 269 simulation and  $\lambda$  was calculated keeping all other vital rates 284  
 270 constant but checking that the stage-specific survival would 285  
 271 not exceed 1. All demographic analyses and numerical simula- 286  
 272 tions were done in R (R Development Core Team, 2017) using 287  
 273 popbio (Stubben and Milligan, 2007). 288

## 274 3 | RESULTS

### 275 3.1 | Population dynamics

276 Original matrices of the columnar cacti concentrated indi- 294  
 277 viduals in juvenile and young adult size categories except in 295

*Cephalocereus tetetzo* and *C. polylophus*. The former had the 278  
 highest proportion of individuals in the seedling stage from 279  
 experimental data (no seedlings under natural conditions) so 280  
 was still an approximation to naturally occurring seedlings 281  
 and is very likely to be an overestimation (Godínez-Alvarez 282  
 et al., 2002) and the latter quantified natural recruitment in 283  
 natural conditions. *Harrisia fragrans* and *H. portoricensis* had 284  
 consistently large proportions of individuals in adult size cat- 285  
 egories. Values of  $\lambda$  were not different from equilibrium for 286  
 most species (Table 2); except for *Carnegiea gigantea*, *C.* 287  
*polylophus*, *H. fragrans*, and *H. portoricensis* which were 288  
 below unity, and only in one species (*Pachycereus pecten-* 289  
*aboriginum*) was it slightly larger than unity. The inclusion 290  
 of a seed bank (WSB) increased  $\lambda$  across eleven species (*C.* 291  
*macrocephalus*, *C. mezcalaensis*, *C. polylophus*, *C. tetetzo*, *E.* 292  
*chiotilla*, *H. fragrans*, *H. portoricensis*, *P. gaumeri*, *P. pecten-* 293  
*aboriginum*, *P. pringlei*, and *S. eruca*), where values (and confi- 294  
 dence intervals) were larger than unity ( $>2.0\%$  increase of 295

**TABLE 2** Data for the 12 columnar cacti species used in the study. Seed *per* fruit, germination (mean proportion) and matrix size corresponds to the original (no reduced dimension) matrix reported in each study, and the value of  $\lambda$  C.I. 95 % for WOSB model ( $6 \times 6$ ) and WSB model ( $7 \times 7$ ) with a hypothetical short-term seed bank ( $=0.05$ ; Figure 1 b). *a* = natural *in situ* estimates, *b* = experimental *in situ* estimates, *c* = experimental *ex situ* estimates and *d* = combined *ex* and *in situ* estimates.

| Columnar cacti species             | Seed/fruit mean | Germination (mean proportion) | Original matrix size | WOSB $6 \times 6$ mean $\lambda$ (95 % C.I.) | WSB $7 \times 7$ mean $\lambda$ (95 % C.I.) |
|------------------------------------|-----------------|-------------------------------|----------------------|----------------------------------------------|---------------------------------------------|
| <i>Carnegiea gigantea</i>          | 244             | 0.0041 <i>b</i>               | 15                   | 0.5404 (0.4178-0.6630)                       | 0.5410 (0.4302-0.6518)                      |
| <i>Cephalocereus macrocephalus</i> | 509             | 0.0280 <i>d</i>               | 10                   | 1.0474 (0.9193-1.1754)                       | 1.0659 (0.9245-1.2073)                      |
| <i>C. mezcalaensis</i>             | 496             | 0.1760 <i>b</i>               | 10                   | 1.0875 (0.9586-1.2164)                       | 1.1148 (0.9679-1.2616)                      |
| <i>C. polylophus</i>               | 976             | 0.0002 <i>a</i>               | 10                   | 0.9827 (0.9414-1.0239)                       | 0.9997 (0.99906-1.0200)                     |
| <i>C. tetetzo</i>                  | 933             | 0.0360 <i>d</i>               | 12,10                | 1.0486 (0.9887-1.1085)                       | 1.0647 (0.9963-1.1331)                      |
| <i>Escrotrinia chiotilla</i>       | 149             | 0.0118 <i>d</i>               | 12                   | 1.0187 (0.9285-1.1089)                       | 1.0331 (0.9323-1.1339)                      |
| <i>Harrisia fragrans</i>           | 1,400           | 0.6400 <i>c</i>               | 6                    | 0.9450 (0.8713-1.0188)                       | 0.9470 (0.8738-1.0201)                      |
| <i>H.portoricensis</i>             | 1,272           | 0.0255 <i>b</i>               | 9                    | 0.9519 (0.8625-1.0413)                       | 0.9984 (0.8974-1.0994)                      |
| <i>Pachycereus gaumeri</i>         | 350             | 0.1770 <i>d</i>               | 10                   | 1.0029 (0.8971-1.1086)                       | 1.0398 (0.9313-1.1482)                      |
| <i>P. pecten-aboriginum</i>        | 539             | 0.0522 <i>b</i>               | 9                    | 1.1035 (0.8443-1.3626)                       | 1.1301 (0.8251-1.4351)                      |
| <i>P. pringlei</i>                 | 1,330           | 0.0010 <i>b</i>               | 10,9                 | 1.0139 (0.9074-1.1204)                       | 1.0252 (0.9074-1.1431)                      |
| <i>Stenocereus eruca</i>           | 336             | 0.3500 <i>d</i>               | 7                    | 1.0253 (0.9774-1.0731)                       | 1.0275 (0.9679-1.0871)                      |

296  $\lambda$ ) and *C. gigantea* that was originally below unity (Table 2 ).  
 297 Including a hypothetical seed bank (WSB) yielded systematic  
 298 significant increases in  $\lambda$  ( $t$ -test = 4.4784,  $df = 11$ ,  $P = 0.001$ ).

### 299 3.2 | The importance of the seed bank

300 The PCA showed that four components accounted for 92.25%  
 301 of the total variance. PC-1 explained 33.98% of the total vari-  
 302 ance with two vital rates: positive growth ( $\gamma$ ) and individual  
 303 fecundity ( $\phi$ ) with high loadings. PC-2 explained 27.10% of  
 304 the residual variance with positively correlated retrogression  
 305 ( $\rho$ ) and negatively correlated with species. PC-3 explained  
 306 18.86% of the residual variance due to the presence/absence of  
 307 a seed bank. PC-4 explained 12.21% of the residual variance  
 308 and positively correlated with survival ( $\sigma$ ) (Supplementary  
 309 Appendix B). In all but PC3 matrix dimensions had no signifi-  
 310 cant effects ( $F_{5,66} = 0.84$ ;  $P = 0.52$ ,  $F_{5,66} = 0.76$ ;  $P = 0.58$ ,  $F_{5,66} =$   
 311  $1.49$ ;  $P = 0.20$ ). For PC3, there was a significant difference  
 312 given by the presence of a seed bank (Figure 2 ) regardless of  
 313 matrix dimension ( $F_{5,66} = 41.44$ ;  $P = 0.0001$ ; Figure 3 ).

### 314 3.3 | Numerical simulations

315 The numerical simulations of the vital rates showed a signifi-  
 316 cant effect on  $\lambda$  by seedling survival ( $\sigma_{se}$ ) (Figure 4 a and f) in  
 317 both SWB and WOSB models, as well as in the seed bank ( $\sigma_{sb}$ )  
 318 (Figure 4 d) for the WSB model. Although survival in the seed  
 319 bank is unknown under field conditions, simulations suggest  $\lambda$   
 320 changes significantly, even with a relatively small shift in the

survival probability. Small changes in the seedling to juvenile  
 ( $\gamma_{se-ju}$ ) and juvenile survival ( $\sigma_{ju}$ ) transitions for the WOSB  
 (Figure 4 b and c) and the seed to seedling ( $\gamma_{sb-se}$ ) in WSB  
 model (Figure 4 e) were particularly important. The recruit-  
 ment of seedlings and their survival of the seed bank seems to  
 be crucial processes for the population dynamics of columnar  
 cacti except in (*C. gigantea*) and (*H. fragrans*), where changes  
 transition from seed to seedling had a negligible impact on  $\lambda$ .

## 329 4 | DISCUSSION

Not explicitly including a seed bank in demographic mod-  
 els continues to be a confounding factor in understanding  
 and modeling population dynamics in columnar cacti. There  
 is very little information in arid environments about what is  
 believed to be the most limiting factor for population dynam-  
 ics: seed banks and seedling dynamics. This is surprising  
 as several studies have highlighted the importance of seed  
 banks for the persistence of populations over time in unpre-  
 dictable environments (Guterman and Venable, 2014) and  
 the extremely limiting conditions for seedlings imposed by  
 abiotic and biotic conditions. Even though there is growing  
 evidence that seed banks can be found in cacti, they have  
 largely been overlooked despite the importance towards pop-  
 ulation dynamics, especially so in the early life stages. No  
 explicit consideration of the seed bank in a population can  
 generate fluctuating degrees of uncertainty in the estimation

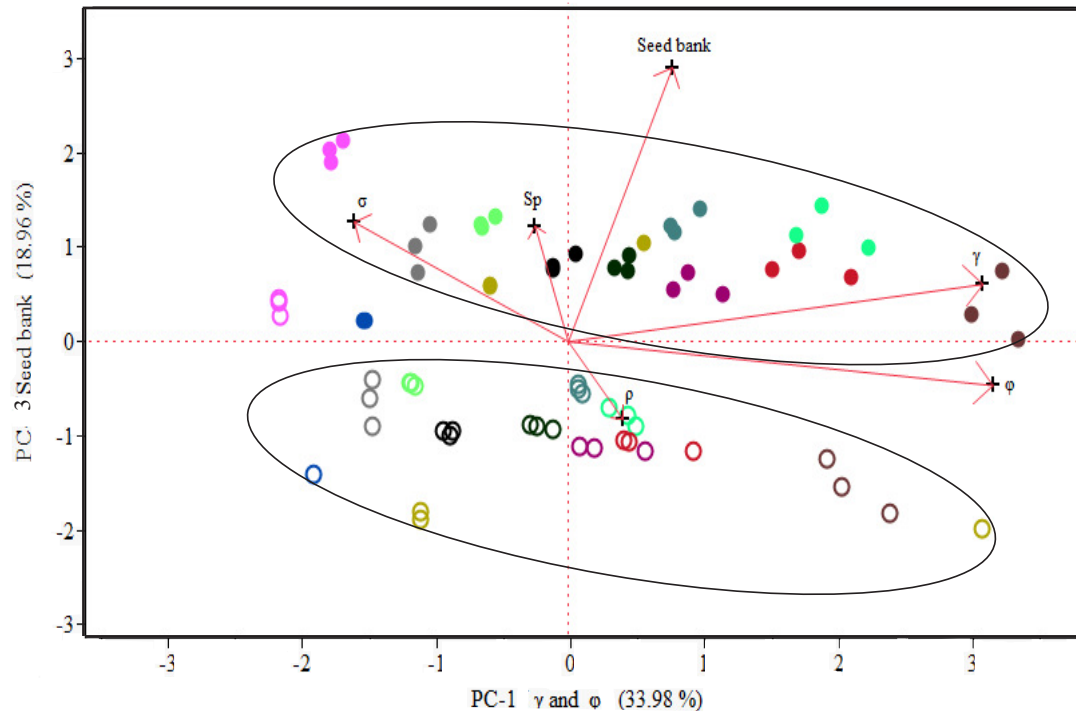

**FIGURE 2** Biplot resulting from principal components analysis (PC 1-3) was used to evaluate elasticities of vital rates: survival in a given stage class ( $\sigma$ ), negative growth ( $\rho$ ), recruitment or positive growth ( $\gamma$ ), individual fecundity ( $\phi$ ), seed bank models, and species effect (Sp). Different colors showed each species of 12 columnar cacti and each ellipse clustered two groups: WOSB (open circles) and WSB models (solid circle).

346 of growth rates and the accuracy of the estimated vital rates  
347 (Nguyen et al., 2019).

348 Most studies of columnar cacti have values of  $\lambda$  that are  
349 not significantly different from equilibrium (Godínez-Álvarez  
350 et al., 2003), with relatively large confidence intervals, sug-  
351 gesting that populations of these species are either stable or  
352 close to equilibrium (Rae and Ebert, 2002; Méndez et al., 2004;  
353 Morales-Romero et al., 2012). Unfortunately, confidence inter-  
354 vals are sufficiently large that any management decision should  
355 be taken with caution if at all. The decrease of  $\lambda$  in two species  
356 (*C. gigantea*, and *H. fragrans*) may be caused by species or  
357 even population-specific factors and inter-annual variations in  
358 climatic factors. External factors are commonly determinants  
359 of the endangered status for cacti species (Goettsch et al.,  
360 2015) including some columnar species (*Carnegiea gigan-*  
361 *tea*, *P. gaumeri*, *S. eruca*, *H. fragrans* and *H. potoricensis*).  
362 The drivers of declining populations are usually associated  
363 to fragmentation and habitat loss (urbanization, road con-  
364 struction, cattle ranch management and agriculture, Esparza-  
365 Olgúin et al., 2002; Méndez et al., 2004; Rojas-Sandoval  
366 and Meléndez-Ackerman, 2013) as well as interannual varia-  
367 tion in climatic factors (Esparza-Olgúin et al., 2002, 2005;  
368 Arroyo-Cosultchi et al., 2016).

369 Overall, the phenomenon of  $\lambda$  close to unity is not surpris-  
370 ing and is actually expected for long-lived species such  
371 as cacti, in which relevant population processes may occur  
372 at the scale of decades (Pierson et al., 2013), slow growth,  
373 late maturity, low fecundity, and high survival probabilities  
374 are common life-history traits (Esparza-Olgúin et al., 2002;  
375 Godínez-Álvarez et al., 2003). Results in this study indi-  
376 cate that columnar species of cacti are at equilibrium with  
377 structures mainly composed of juvenile and young adults  
378 and consistent low numbers of seedling numbers (except for  
379 *Cephalocereus polylophus* (Arroyo-Cosultchi et al., 2016) and  
380 *C. tetetzo* (Godínez-Alvarez and Valiente-Banuet, 2004)). A  
381 limitation of this study was the minimization of interannual  
382 and interpopulation variability by averaging matrices as well  
383 as ignoring episodic interannual recruitment, although these  
384 were out of the scope of our research.

385 An increase in  $\lambda$  followed the addition of a hypothetical tran-  
386 sient seed bank. Seed banks seem to be more widespread than  
387 previously thought as evidence suggests short term seed banks  
388 in the subtribe Stenocerinae (*Myrtillocactus geometrizans*,  
389 *Polaskia chende*, *Stenocereus* sp. and *Stenocereus stelatus*)  
390 (Ordoñez, 2008; Cano-Salgado et al., 2012; Álvarez-Espino  
391 et al., 2014; Ordoñez Salanueva et al., 2017) and the tribe

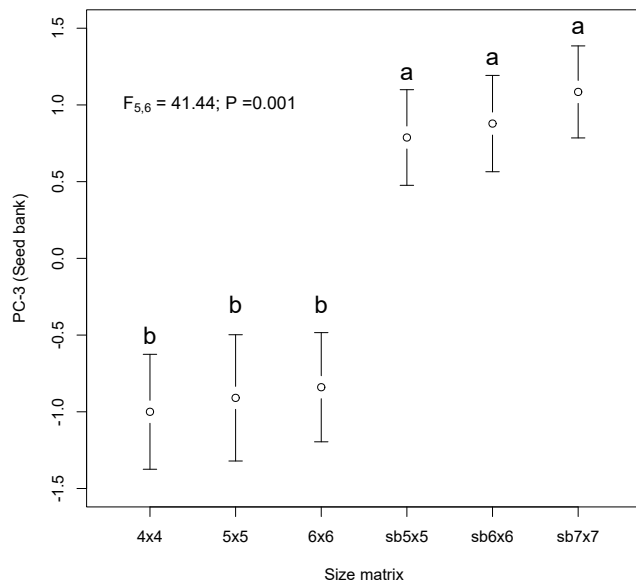

**FIGURE 3** Average ( $\pm$  95 CI) of PC-3 (seed bank model) against matrix dimension (WOSB = 6x6, 5x5 and 4x4; WSB = sb7x7, sb6x6, and sb5x5). Different letters indicate differences between matrix dimensions with and without seed bank ( $P < 0.05$ ).

392 Trichocereae (*Harrisia fragrans*) (Goodman et al., 2012).  
 393 Even though adult longevity in the Cactaceae is high and  
 394 seed banks would not be theoretically expected, seed banks  
 395 decouple reproduction from other life stages which buffer  
 396 against environmental variation. A clearer understanding of  
 397 age-dependent germination rates of seeds, age-dependent sur-  
 398 vival of non-germinated seeds, and the production of new  
 399 seeds by reproductive plants (Doak et al., 2002) is needed  
 400 to determine the specific factors (e.g., environmental, physi-  
 401 ological) that contribute to their formation. The presence of  
 402 seed banks changes the life history of species and has a small  
 403 but positive consequence of population growth rates that may  
 404 compound population dynamics in variable environments.

405 The population dynamics of the majority of the studied  
 406 species strongly depends on the survival of adult individu-  
 407 als and the growth of intermediate stages in the life cycle,  
 408 a pattern similar to that reported for many long-lived plants  
 409 including succulents, shrubs, and trees (Silvertown et al., 1993;  
 410 Enright et al., 1995; Franco and Silvertown, 2004). Arid and  
 411 semi-arid environments pose important challenges for plant  
 412 persistence, and species rely on recruitment whereby the lack  
 413 of recruitment at any given time gives the impression of a

slowly decreasing population that depends on survival (Hol- 414  
 land and Molina-Freaner, 2013). In the case of *C. gigantea*, 415  
*H. portoricensis* and *C. polylophus*, the recurring presence 416  
 of freezing and ENSO have been shown to be phenomena 417  
 that strongly impacted populations by either high mortal- 418  
 ity or recruitment (Pierson et al., 2013; Rojas-Sandoval and 419  
 Meléndez-Ackerman, 2013; Arroyo-Cosultchi et al., 2016). 420  
 The lack of recruitment in the studies on columnar and other 421  
 cacti species points towards a limiting demographic stage, 422  
 and has often been associated to seed predation (seed lim- 423  
 itation) and/or high seedling mortality (seedling limitation) 424  
 (Mandujano et al., 2001; Esparza-Olguín et al., 2002, 2005;  
 Ferrer-Cervantes et al., 2012; Rojas-Sandoval and Meléndez-  
 Ackerman, 2013; Zepeda-Martínez et al., 2013). 427

Low water availability and the quantity of solar radiation 428  
 that characterize arid and semi-arid environments impose seri- 429  
 ous limitations on population growth, mainly because they 430  
 induce high seedling mortality and limit the establishment 431  
 of new individuals (Steenbergh and Lowe, 1977). The PCA 432  
 allowed us to identify that the vital rates corresponding to po- 433  
 sitive growth and fecundity were higher, so these vital rates 434  
 had significant effects on population dynamics. The results of 435  
 the analysis variance of the seed bank inclusion were shown 436  
 important and the effect of the matrix size was negligible. 437  
 Adding a seed bank increased the importance of the vital rates 438  
 (positive growth and fecundity) for the early life stages and 439  
 our results from numerical simulations showed that changes in 440  
 seedling survival and seed bank could have significant effects 441  
 on the population dynamics of columnar cacti and therefore 442  
 protecting the seed bank is essential to the persistence of these 443  
 species. 444

The simulations suggest that in most cases, seedling limita- 445  
 tion has a larger effect than seed limitation in the population 446  
 dynamics of cacti. Columnar cacti are strongly seed-limited by 447  
 the variable reproduction of adults, and the high predation of 448  
 seed but are also seedling-limited as even when enough seeds 449  
 are produced, seedlings do not survive. The early stages are 450  
 a possible option for the management of cacti species which 451  
 should consider manipulations to enhance/reduce recruitment 452  
 by either active introduction/elimination of juveniles or by 453  
 increasing/decreasing the survival probabilities of naturally 454  
 established plants. For example, several species of *Harrisia* 455  
 (*H. balansae*, *H. martinii*, *H. pomanensis* and *H. tortuosa*) are 456  
 considered highly invasive (Novoa et al., 2015) and control of 457  
 early stages could help manage these populations. On the other 458  
 hand, four species (*H. fragrans*, *H. portoricensis*, *P. gaumeri* 459  
 and *C. polylophus*) have some degree of endangered status so 460  
 increasing the seed-seedling transitions can provide solutions 461  
 for conservation strategies. The cost-efficient management of 462  
 cacti would indicate that for conservation purposes, the reintro- 463  
 duction by transplanting nursery reared seedlings or juveniles 464



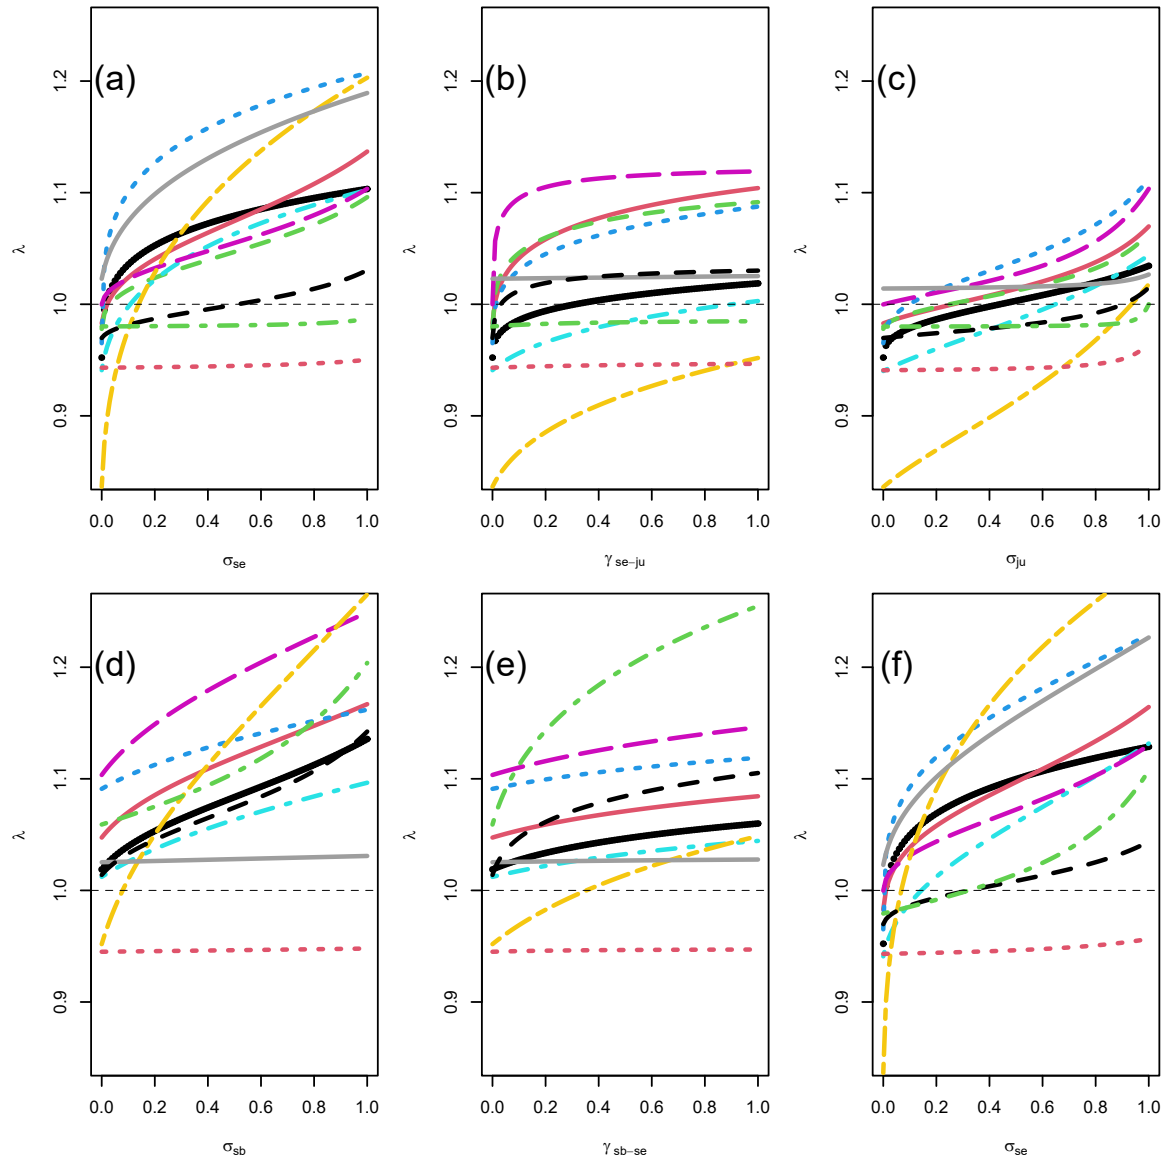

**FIGURE 4** Population growth rates ( $\lambda$ ) as a function of seedling survival ( $\sigma_{se}$ ) (a), seedling to juvenile ( $\gamma_{se-ju}$ ) (b), juvenile survival ( $\sigma_{ju}$ ) (c), seed bank ( $\sigma_{sb}$ ) (d), germination ( $\gamma_{sb-se}$ ) (e) and seedling survival ( $\sigma_{se}$ ) (f). Eleven columnar cacti were using the WOSB model 6x6 (a-c) and WSB model 7x7 (d-f) and simulated by changing the values, between 0 and 1 at intervals of 0.01, from each vital rates. The grey dotted line is equilibrium,  $\lambda = 1$ . The black lines correspond to columnar cacti. It was not included *Carnegiea gigantea* to present small values of  $\lambda \approx 0.50$ . Different line colors showed of each species of 11 columnar cacti.

465 (reducing seedling limitation) to be a better strategy than sowing seeds (seed augmentation) directly into the wild (Birnbaum  
466 et al., 2011; Reemts et al., 2014).  
467

468 Seed banking may increase seedling recruitment of columnar cacti by increasing seedling opportunities when conditions  
469 are favorable for survival. Their effect would also suggest that  
470

several columnar cacti populations are not threatened in demographic conditions under the assumptions used in this study.  
471 This by no means suggests that other contributing factors to their decline should not be considered for conservation (see  
472 Goettsch et al., 2015). If we consider that Rojas-Aréchiga  
473 (2014) found positive photoblastism and seed size as phylogenetically associated to the subtribe Stenocerinae, at least the  
474  
475  
476  
477

478 physiological component of seed bank formation is favored in  
479 this group (Rojas-Aréchiga and Batis, 2001). We are in need  
480 to clearly determine the presence and longevity of seeds for  
481 many cacti species and untangle the factors behind seed and  
482 seedling limitation to adequately portray the life cycle of this  
483 taxonomic group.

## 484 Acknowledgements

485 This research is part of the doctoral studies of Gabriel  
486 Arroyo- Cosultchi (UAM-X). Financial support was provided  
487 by CONACyT (165908) to MCM, CONACyT sabbatical leave  
488 scholarship to JG and PASPA-DGAPA sabbatical scholarship  
489 to MCM. Comments by M. Rojas Aréchiga and M. Franco  
490 significantly improved this manuscript. Thanks are also due  
491 to M. Franco and R. Clark-Tapia, who made available the  
492 demographic data for *Carnegiea giganteae* and *Stenocereus*  
493 *eruca*.

## 494 Appendix Supplementary data

495 Supplementary material related to this article can be found, in  
496 the online version, at doi:.

## 497 References

498 Adams, V. M., Marsh, D. M. and Knox, J. S. (2005). Impor-  
499 tance of the seed bank for population viability and popula-  
500 tion monitoring in a threatened wetland herb. *Biol. Conserv.*  
501 *124*, 425–436.

502 Adier, P. B., Salguero-Gómez, R., Compagnoni, A., Hsu, J. S.,  
503 Ray-Mukherjee, J., Mbeau-Ache, C. and Franco, M. (2014).  
504 Functional traits explain variation in plant life history strate-  
505 gies. *PNAS* *111*, 740–745.

506 Ågren, J. (1996). Population size, pollinator limitation, and  
507 seed set in the self-incompatible herb *Lythrum salicaria*.  
508 *Ecology* *77*, 1779–1790.

509 Alvarez-Buylla, E. and Slatkin, M. (1991). Finding confidence  
510 limits on population growth rates. *Trends Ecol Evol* *6*, 221–  
511 224.

512 Álvarez-Espino, R., Godínez-Álvarez, H. and De la Torre-  
513 Almaráz, R. (2014). Seed banking in the columnar cactus  
514 *Stenocereus stellatus*: distribution, density and longevity of  
515 seeds. *Seed Sci Res* *24*, 315–320.

516 Anderson, E. F. (2001). *The Cactus Family*. Timber Press,  
517 Portland, Oregon, USA.

Arroyo-Cosultchi, G., Golubov, J. and Mandujano, M. (2016).  
Pulse seedling recruitment on the population dynamics of a  
columnar cactus: Effect of an extreme rainfall event. *Acta*  
*Oecol* *71*, 52–60.

Bakker, J. P., Poschlod, P., Strykstra, R. J., Bekker, R. M.  
and Thompson, K. (1996). Seed banks and seed dispersal:  
important topics in restoration ecology. *Acta Bot Neerl* *45*,  
461–490.

Baskin, J. M. and Baskin, C. C. (1989). Physiology of dor-  
mancy and germination in relation to seed bank ecology. In  
*Ecology of soil seed banks*, (Leck, M. A., Parker, V. T. and  
Simpson, R. L., eds), pp. 53–66. Academic Press San Diego,  
USA.

Baudisch, A., Salguero-Gómez, R., Jones, O. R., Wrycza, T.,  
Mbeau-Ache, C., Franco, M. and Colchero, F. (2013). The  
pace and shape of senescence in angiosperms. *J Ecol* *101*,  
596–606.

Bell, D. T., Plummer, J. A. and Taylor, S. K. (1993). Seed ger-  
mination ecology in southwestern Western Australia. *Bot*  
*Rev* *59*, 24–73.

Birnbaum, S. J., Poole, J. M. and Williamson, P. S. (2011).  
Reintroduction of star cactus *Astrophytum asterias* by seed  
sowing and seedling transplanting, Las Estrellas Preserve,  
Texas, USA. *Conserv Evid* *8*, 43–52.

Bowers, J. E. (2005). New Evidence for Persistent or Transient  
Seed Banks in Three Sonoran Desert cacti. *Southwest Nat*  
*50*, 482–487.

Burns, J. H., Blomberg, S. P., Crone, E. E., Ehrlén, J., Knight,  
T. M., Pichancourt, J. B., Ramula, S., Wardle, G. M. and  
Buckley, Y. M. (2010). Empirical tests of life-history evo-  
lution theory using phylogenetic analysis of plant demogra-  
phy. *J Ecol* *98*, 334–344.

Cano-Salgado, A., Zavala-Hurtado, J. A., Orozco-Segovia,  
A., Valverde-Valdés, M. T. and Pérez-Rodríguez, P. (2012).  
Composición y abundancia del banco de semillas en  
una región semiárida del trópico mexicano: patrones de  
variación espacial y temporal. *Rev Mex Biodivers* *83*,  
436–446.

Caswell, H. (2001). *Matrix population models: construction,  
analysis and interpretation*. 2nd edition, Sinauer Associates,  
Sunderland, Massachusetts, USA.

Clark, C. J., Poulsen, J. R., Levey, D. J. and Osenberg, C. W.  
(2007). Are plant populations seed limited? A critique and  
meta-analysis of seed addition experiments. *Am Nat* *170*,  
128–142.

518  
519  
520  
521  
522  
523  
524  
525  
526  
527  
528  
529  
530  
531  
532  
533  
534  
535  
536  
537  
538  
539  
540  
541  
542  
543  
544  
545  
546  
547  
548  
549  
550  
551  
552  
553  
554  
555  
556  
557  
558  
559  
560  
561  
562

- 563 Clark-Tapia, R., Mandujano, M. C., Valverde, T., Mendoza,  
564 A. and Molina-Freaner, F. (2005). How important is  
565 clonal recruitment for population maintenance in rare plant  
566 species?: the case of the narrow endemic cactus, *Steno-*  
567 *cereus eruca*, in Baja California, México. *Biol Conserv* 124,  
568 123–132.
- 569 Cody, M. L. (1993). Do Cholla Cacti (*Opuntia spp.*, subgenus  
570 *Cylindropuntia*) use or need nurse plants in the Mojave  
571 Desert? *J Arid Environ* 24, 139–154.
- 572 Cohen, D. (1966). Optimizing reproduction in a randomly  
573 varying environment. *J. Theor. Biol.* 12, 119–129.
- 574 Crawley, M J. and Ross, G. J. S. (1990). The Population  
575 Dynamics of Plants [and Discussion]. *Philos T Roy Soc B*  
576 330, 125–140.
- 577 Doak, D. F., Thompson, D. and Jules, E. S. (2002). Population  
578 viability analysis for plants: understanding the demographic  
579 consequences of seed banks for population health. In *Pop-*  
580 *ulation Viability Analysis*, (Beissinger, S. R. and Mc Cul-
- 581 lough, D. R., eds), pp. 312–337. University of Chicago  
582 Press.
- 583 Enright, N. J., Franco, M. and Silvertown, J. (1995). Compar-  
584 ing plant life histories using elasticity analysis: the impor-  
585 tance of life span and the number of life-cycle stages.  
586 *Oecologia* 104, 79–84.
- 587 Eriksson, O. and Ehrlén, J. (1992). Seed and microsite limi-  
588 tation of recruitment in plant populations. *Oecologia* 91,  
589 360–364.
- 590 Eriksson, O. and Ehrlén, J. (2008). Seedling recruitment and  
591 population ecology. In *Seedling Ecology and Evolution*,  
592 (Leck, M. A., Parker, V. T. and Simpson, R. L., eds), p.  
593 239–254. Cambridge University Press.
- 594 Esparza-Olguín, L., Valverde, T. and Mandujano, M. C.  
595 (2005). Comparative demographic analysis of three  
596 *Neobuxbaumia* species (Cactaceae) with differing degree of  
597 rarity. *Popul Ecol* 47, 229–245.
- 598 Esparza-Olguín, L., Valverde, T. and Vilchis-Anaya, E.  
599 (2002). Demographic analysis of a rare columnar cactus  
600 (*Neobuxbaumia macrocephala*) in the Tehuacan Valley,  
601 Mexico. *Biol Conserv* 103, 349–359.
- 602 Ferrer-Cervantes, M. E., Méndez-González, M. E., Quintana-  
603 Ascencio, P. F., Dorantes, A., Dzib, G. and Durán, R. (2012).  
604 Population dynamics of the cactus *Mammillaria gaumeri*:  
605 An integral projection model approach. *Popul Ecol* 54, 321–  
606 334.
- Franco, M. and Silvertown, J. (2004). A comparative demogra-  
phy of plants based upon elasticities of vital rates. *Ecology*  
85, 531–538.
- Godínez-Alvarez, H. and Valiente-Banuet, A. (2004). Demog-  
raphy of the columnar cactus *Neobuxbaumia macrocephala*:  
a comparative approach using population projection matri-  
ces. *Plant Ecol* 174, 109–118.
- Godínez-Alvarez, H., Valiente-Banuet, A. and Banuet, L. V.  
(1999). Biotic interactions and the population dynamics of  
the long-lived columnar cactus *Neobuxbaumia tetetzo* in the  
Tehuacán Valley, Mexico. *Can J Bot* 77, 203–208.
- Godínez-Alvarez, H., Valiente-Banuet, A. and Rojas-  
Martínez, A. (2002). The role of seed dispersers in the  
population dynamics of the columnar cactus *Neobuxbaumia*  
*tetetzo*. *Ecology* 83, 2617–2629.
- Godínez-Álvarez, H., Valverde, T. and Ortega-Baes, P. (2003).  
Demographic trends in the Cactaceae. *Bot Rev* 69, 173–  
201.
- Goettsch, B., Hilton-Taylor, C., Cruz-Piñón, G., Duffy, J.,  
Frances, A., Hernández, H., Inger, R., Pollock, C., Schip-  
per, J., Superina, M., Taylor, N., Tognelli, M., Abba, A.,  
Arias, S., Arreola-Nava, H., Baker, M., Bárcenas, R., Bar-  
rios, D., Braun, P., Butterworth, C., Búrquez, A., Caceres,  
F., Chazaro-Basañez, M., Corral-Díaz, R., Del Valle Perea,  
M., Demaio, P., Duarte De Barros, W., Durán, R., Yancas,  
L., Felger, R., Fitz-Maurice, B., Fitz-Maurice, W., Gann, G.,  
Gómez-Hinostrosa, C., Gonzales-Torres, L., Patrick Grif-  
fith, M., Guerrero, P., Hammel, B., Heil, K., Hernández-  
Oria, J., Hoffmann, M., Ishihara, M., Kiesling, R., Larocca,  
J., León-De La Luz, J., Loaiza S., C., Lowry, M., MacHado,  
M., Majure, L., Ávalos, J., Martorell, C., Maschinski, J.,  
Méndez, E., Mittermeier, R., Nassar, J., Negrón-Ortiz, V.,  
Oakley, L., Ortega-Baes, P., Ferreira, A., Pinkava, D.,  
Porter, J., Puente-Martinez, R., Gamarra, J., Pérez, P.,  
Martínez, E., Smith, M., Manuel Sotomayor M Del C, J.,  
Stuart, S., Muñoz, J., Terrazas, T., Terry, M., Trevisson, M.,  
Valverde, T., Van Devender, T., Véliz-Pérez, M., Walter, H.,  
Wyatt, S., Zappi, D., Alejandro Zavala-Hurtado, J. and Gas-  
ton, K. (2015). High proportion of cactus species threatened  
with extinction. *Nature Plants* 1.
- Goodman, J., Walters, D., Bradley, K., Maschinski, J. and  
Salazar, A. (2012). Seeds of endangered *Harrisia fragrans*  
form persistent soil seed banks and withstand orthodox  
storage conditions. *Haseltonia* 18, 85–94.
- Gutterman, Y. (1994). Strategies of seed dispersal and germi-  
nation in plants inhabiting deserts. *Bot Rev* 60, 373–425.

- 653 Gutterman, Y. and Venable, D. (2014). Bet hedging in desert  
654 winter annual plants: optimal germination strategies in a  
655 variable environment. *Ecology Letters* 17, 380–387.
- 656 Holland, J. N. and Molina-Freaner, F. (2013). Hierarchical  
657 effects of rainfall, nurse plants, granivory and seed banks on  
658 cactus recruitment. *J Veg Sci* 24, 1053–1061.
- 659 Hooley, D. E. (2000). Collapsed Matrices with (Almost) the  
660 Same Eigenstuff. *Coll Math J* 31, 297–299.
- 661 Jones, O. R., Scheuerlein, A., Salguero-Gómez, R., Camarda,  
662 C. G., Schaible, R., Casper, B. B., Dahlgren, J. P., Ehrlén,  
663 J., García, M. B., Menges, E. S., Quintana-Ascencio, P. F.,  
664 Caswell, H., Baudisch, A. and Vaupel, J. W. (2014). Diver-  
665 sity of ageing across the tree of life. *Nature* 505, 169–173.
- 666 Kalisz, S. and McPeck, M. (1992). Demography of an age-  
667 structured annual: resampled projection matrices, elasticity  
668 analyses, and seed bank effects. *Ecology* 73, 1082–1093.
- 669 Lindow-López, L., Galíndez, G., Sühring, S., Pastrana-Ignes,  
670 V., Gorostiague, P., Gutiérrez, A. and Ortega-Baes, P.  
671 (2018). Do cacti form soil seed banks? An evaluation using  
672 species from the Southern Central Andes. *Plant Biol* 20,  
673 1053–158.
- 674 Mandujano, M. C., Bravo, Y., Verhulst, J., Carrillo-Angeles,  
675 I. and Golubov, J. (2015). The population dynamics of an  
676 endemic collectible cactus. *Acta Oecol* 63, 1–7.
- 677 Mandujano, M. C., Golubov, J. and Huenneke, L. (2007).  
678 Effect of reproductive modes and environmental hetero-  
679 geneity in the population dynamics of a geographically  
680 widespread clonal desert cactus. *Popul Ecol* 49, 141–153.
- 681 Mandujano, M. C., Golubov, J. and Montaña, C. (1997). Dor-  
682 mancy and endozoochorous dispersal of *Opuntia rastrera*  
683 seeds in the southern Chihuahuan Desert. *J Arid Environ*  
684 36, 259–266.
- 685 Mandujano, M. C., Montaña, C. and Eguiarte, L. E. (1996).  
686 Reproductive ecology and inbreeding depression in *Opun-*  
687 *tia rastrera* (Cactaceae) in the Chihuahuan Desert: Why are  
688 sexually derived recruitments so rare? *Am J Bot* 83, 63–70.
- 689 Mandujano, M. C., Montaña, C., Franco, M., Golubov, J. and  
690 Flores-Martínez, A. (2001). Integration of demographic  
691 annual variability in a clonal desert cactus. *Ecology* 82,  
692 344–359.
- 693 Martínez, A. F., Medina, G. I. M., Golubov, J., Montaña, C. and  
694 Mandujano, M. C. (2010). Demography of an endangered  
695 endemic rupicolous-cactus. *Plant Ecol* 210, 53–66.
- Méndez, M., Durán, R., Olmsted, I. and Oyama, K. (2004). 696  
Population dynamics of *Pterocereus gaumeri*, a rare and 697  
endemic columnar cactus of Mexico. *Biotropica* 36, 492– 698  
504. 699
- Morales-Romero, D., Godínez-Álvarez, H., Campo-Alves, J. 700  
and Molina-Freaner, F. (2012). Effects of land conversion on 701  
the regeneration of *Pachycereus pecten-aboriginum* and its 702  
consequences on the population dynamics in northwestern 703  
Mexico. *J Arid Environ* 77, 123–129. 704
- Morris, W. and Doak, D. (2002). Quantitative conservation 705  
biology: theory and practice of population viability analysis. 706  
Sinauer, Sunderland. 707
- Nguyen, V., Buckley, Y., Salguero-Gómez, R. and Wardle, G. 708  
(2019). Consequences of neglecting cryptic life stages from 709  
demographic models. *Ecol Model* 408. 710
- Novoa, A., Le Roux, J. J., Robertson, M. P., Wilson, J. R. U. 711  
and Richardson, D. M. (2015). Introduced and invasive 712  
cactus species: a global review. *AoB Plants* 7, plu078. 713
- Ordoñez, S. C. (2008). Características ecológicas y fisiológ- 714  
icas del banco de semillas de *Polaskia chende*. Master’s 715  
thesis UNAM México. 716
- Ordoñez Salanueva, C. A., Orozco-Segovia, A., Canales- 717  
Martínez, M., Seal, C. E., Pritchard, H. W. and Flores-Ortiz, 718  
C. M. (2017). Ecological longevity of *Polaskia chende* (Cac- 719  
taceae) seeds in the soil seed bank, seedling emergence and 720  
survival. *Plant Biol* 19, 973–982. 721
- Ortega, B. (2001). Demografía de la cactácea columnar 722  
*Escontria chiotilla*. Master’s thesis UNAM México. 723
- Pake, C. E. and Venable, D. L. (1996). Seed banks in desert 724  
annuals: Implications for persistence and coexistence in 725  
variable environments. *Ecology* 77, 1427–1435. 726
- Picard, N. and Liang, J. (2014). Matrix Models for Size- 727  
Structured Populations: Unrealistic Fast Growth or Simply 728  
Diffusion? *PLoS ONE* 9, e98254. 729
- Pierson, E. A., Turner, R. M. and Betancourt, J. L. (2013). 730  
Regional demographic trends from long-term studies of 731  
saguaro (*Carnegiea gigantea*) across the northern Sonoran 732  
Desert. *J Arid Environ* 88, 57–69. 733
- R Development Core Team (2017). R: a language and environ- 734  
ment for statistical computing. R Foundation for Statistical 735  
Computing. 736
- Rae, G. J. and Ebert, A. T. (2002). Demography of the endan- 737  
gered fragrant prickly apple cactus, *Harrisia fragrans*. *Int J* 738  
*Plant Sci* 163, 631–640. 739

- Ramula, S., Knight, T. M., Burns, J. H. and Buckley, Y. M. (2008). General guidelines for invasive plant management based on comparative demography of invasive and native plant populations. *J Appl Ecol* 45, 1124–1133.
- Ramula, S. and Lehtilä, K. (2005). Matrix dimensionality in demographic analyses of plants: when to use smaller matrices? *Oikos* 111, 563–573.
- Reemts, C. M., Conner, P., Janssen, G. K. and Wahl, K. (2014). Survival of planted star cactus, *Astrophytum asterias*, in southern Texas. *Southwest Nat* 59, 122–125.
- Rees, M. (1994). Delayed germination of seeds: A look at the effects of adult longevity, the timing of reproduction and population age/stage structure. *Am Nat* 144, 43–64.
- Rojas-Aréchiga, M. (2014). Patrones de respuesta fotoblástica en las semillas de cactáceas: un enfoque ecológico y filogenético. PhD thesis, Universidad Autónoma Metropolitana.
- Rojas-Aréchiga, M. and Batis, A. I. (2001). Las semillas de cactáceas...¿forman banco en el suelo? *Cact Suc Mex* 46, 76–82.
- Rojas-Sandoval, J. and Meléndez-Ackerman, E. (2013). Population dynamics of a threatened cactus species: general assessment and effects of matrix dimensionality. *Popul Ecol* 55, 479–491.
- Salguero-Gómez, R. and de Kroon, H. (2010). Matrix projection models meet variation in the real world. *J Ecol* 98, 250–254.
- Salguero-Gómez, R., Owen, R. J., Archer, C. R., Buckley, Y. M., Che-Castaldo, J., Caswell, H., Hodgson, D., Scheuerlein, A., Conde, D. A., Brinks, E., de Buhr, H., Farack, C., Gottschalk, F., Hartmann, A., Henning, A., Hoppe, G., Römer, G., Runge, J., Ruoff, T., Wille, J., Zeh, S., Davison, R., Viereg, D., Baudisch, A., Altwegg, R., Colchero, F., Dong, M., de Kroon, H., Lebreton, J.-D., Metcalf, C. J. E., Neel, M. M., Parker, I. M., Takada, T., Valverde, T., Vélez-Espino, L. A., Wardle, G. M., Franco, M. and Vaupel, J. W. (2015). The COMPADRE Plant Matrix Database: an open online repository for plant demography. *J Ecol* 103, 202–218.
- Salguero-Gómez, R. and Plotkin, J. B. (2010). Matrix dimensions bias demographic inferences: Implications for Comparative Plant Demography. *Am. Nat* 176, 710–722.
- Schmalzel, R. J., Reichenbacher, F. W. and Rutman, S. (1995). Demographic study of the rare *Coryphantha robbinsorum* (Cactaceae) in Southeastern Arizona. *Madroño* 42, 332–348.
- Silva, P. (1996). Demografía comparativa de *Pachycereus pringlei* en dos unidades geomórficas contrastantes del paisaje en Baja California Sur, México. Master's thesis UNAM.
- Silvertown, J., Franco, M., Pisanty, I. and Mendoza, A. (1993). Comparative Plant Demography—Relative Importance of Life-Cycle Components to the Finite Rate of Increase in Woody and Herbaceous Perennials. *J Ecol* 81, 465–476.
- Silvertown, J., McConway, K. J., Hughes, Z., Biss, P., Macnair, M. and Lutman, P. (2002). Ecological and genetic correlates of long-term population trends in the park grass experiment? *Am Nat* 160, 409–420.
- Sosa, V. J. and Fleming, T. H. (2002). Why are columnar cacti associated with nurse plants? In *Columnar Cacti and their Mutualists. Evolution, Ecology and Conservation*, (Fleming, T. H. and Valiente-Banuet, A., eds), pp. 306–323. The University of Arizona Press Tucson, USA.
- Steenbergh, W. F. and Lowe, C. H. (1977). Ecology of the saguaro II: reproduction, germination, establishment, growth, and survival of the young plant. 8, National Park Service Scientific Monograph.
- Stubben, C. and Milligan, B. (2007). Estimating and Analyzing Demographic Models Using the popbio Package in R. *J Stat Softw* 22, 1–23.
- Thompson, K., Bakker, J. P. and Bekker, R. M. (1997). The soil seed banks of North West Europe: Methodology, density and longevity. Cambridge University Press.
- Turnbull, L. A., Crawley, M. J. and Rees, M. (2000). Are plant populations seed-limited? A review of seed sowing experiments. *Oikos* 88, 225–238.
- Valiente-Banuet, A. and Ezcurra, E. (1991). Shade as a cause of the association between the cactus *Neobuxbaumia tetetzo* and the nurse plant *Mimosa luisana* in the Tehuacan Valley, Mexico. *J Ecol* 79, 961–971.
- Venable, D. L. (2007). Bet hedging in a guild of desert annuals. *Ecology* 88, 1086–1090.
- Zepeda-Martínez, V., Mandujano, M. C., Mandujano, F. J. and Golubov, J. K. (2013). What can the demography of *Astrophytum ornatum* tell us of its endangered status? *J Arid Environ* 88, 244–249.

**How to cite this article:** Arroyo-Cosultchi, G, Mandujano, MC, Salguero-Gómez, R., Martínez, AJ, and J. Golubov (2020), What are the demographic consequences of a seed bank stage on columnar cacti?, *Pop.Ecol.*, 2020;00:0–0.
